# Supplementary material
Source: HighWire-hosted journal article supplement (https://www.canjsurg.ca/highwire/filestream/96813/field_highwire_adjunct_files/0/cjs-016218-1-at.pdf)
Supplement: cjs-016218-1-at.pdf [file cjs-016218-1-at.pdf]

DOI: 10.1503/cjs.016218

Copyright © 2019 The Author(s) or their employer(s).

To receive this resource in an accessible format, please contact us at [cmajgroup@cmaj.ca](mailto:cmajgroup@cmaj.ca).

*Online appendices are unedited and posted as supplied by the authors.*

## Appendix 1: Identification of initial treatment group to form a categorical variable:

### i) Cast immobilization:

#### **Radius or ulna – unspecified site**

F031 – no reduction, rigid immobilization

F032 – closed reduction

#### **Radius – distal, e.g. Colles', Smith's, or Barton's fracture**

F027 – no reduction, rigid immobilization

F028 – closed reduction, under local or regional anaesthetic

F046 – closed reduction, under general anaesthetic

#### **Fixation**

E544 – cast bracing with closed reduction, to closed reduction fee ... add 40% (note: this code is billed in

conjunction with one of the above codes)

Check to make sure that no cast immobilization received any of the following surgical codes (listed in ii, iii, and iv) within 3 weeks of cast immobilization OHIP fee code service date. If they did receive any of the following surgical codes, then they fall into the corresponding surgical group (ii, iii, or iv).

### ii) Percutaneous pinning with cast immobilization

The following Fixation fee code within 3 weeks:

E569 – percutaneous pinning, to closed reduction fee ... add 50%

+/- any of the above cast immobilization OHIP billing fees

### iii) External fixation

The following Fixation fee code within 3 weeks:

E555 – rigid external fixation (excluding casts) for closed reduction, to closed reduction fee ... add 50%

+/- any of the above cast immobilization OHIP billing fees

### iv) Open reduction and internal fixation

Any of the above cast immobilization OHIP billing fees AND the following Open reduction fee codes

within 3 weeks OR just the following **Open reduction** fee codes:

#### **Radius or ulna – unspecified site**

F033 – open reduction

#### **Radius – distal, e.g. Colles', Smith's, or Barton's fracture**

F030 – open reduction

#### **Osteochondral**

F021 – open reduction

*Online appendices are unedited and posted as supplied by the authors.*

**Table S1: The Gross Number of Fractures Treated by Cast Immobilization (CI), Percutaneous pinning with cast immobilization (PP+CI), External Fixation (EF), and Open Reduction and Internal Fixation (ORIF) by Year**

| Year | CI     | PP+CI | EF  | ORIF  |
|------|--------|-------|-----|-------|
| 2004 | 16,520 | 1,211 | 654 | 1,407 |
| 2005 | 17,466 | 1,191 | 637 | 1,520 |
| 2006 | 16,636 | 1,180 | 515 | 1,699 |
| 2007 | 18,562 | 1,182 | 510 | 1,946 |
| 2008 | 19,310 | 1,232 | 430 | 2,371 |
| 2009 | 18,222 | 1,110 | 402 | 2,458 |
| 2010 | 18,575 | 948   | 376 | 2,528 |
| 2011 | 19,680 | 722   | 380 | 2,866 |
| 2012 | 19,243 | 632   | 318 | 2,902 |
| 2013 | 21,330 | 554   | 287 | 3,184 |
